# Supplementary material for: Palaeoenvironmental research at Hawelti–Melazo (Tigray, northern Ethiopia) – insights from sedimentological and geomorphological analyses
Source: Copernicus journal article supplement (doi:10.5194/egqsj-72-37-2023), 2023-01-26

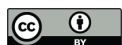

*Supplement of*

**Palaeoenvironmental research at Hawelti–Melazo (Tigray, northern Ethiopia) – insights from sedimentological and geomorphological analyses**

**Jacob Hardt et al.**

*Correspondence to:* Jacob Hardt ([jacob.hardt@fu-berlin.de](mailto:jacob.hardt@fu-berlin.de))

The copyright of individual parts of the supplement might differ from the article licence.



Photograph of section PG1 – upper part

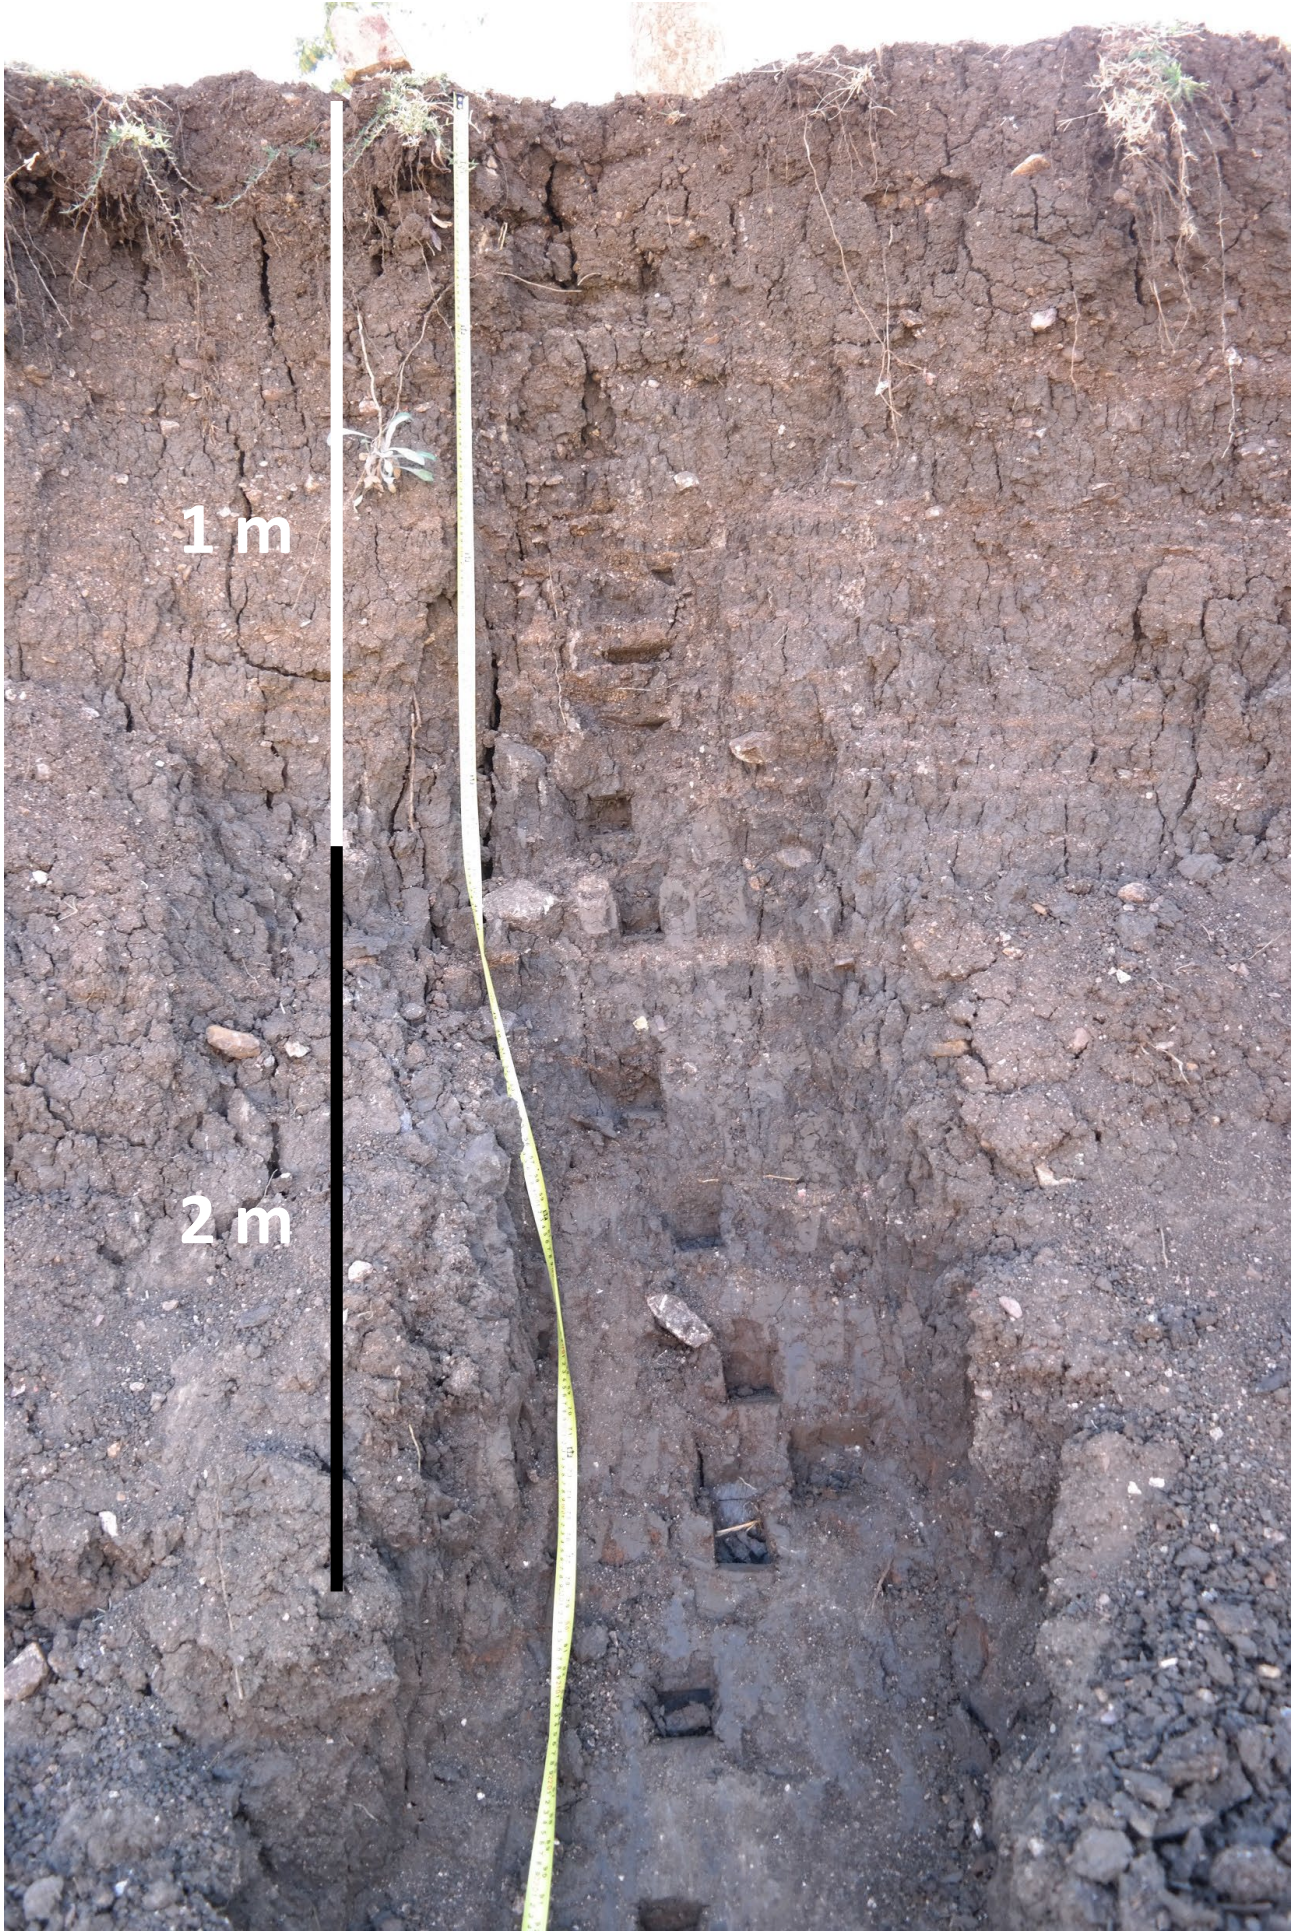



Photograph of section PG1 – lower part

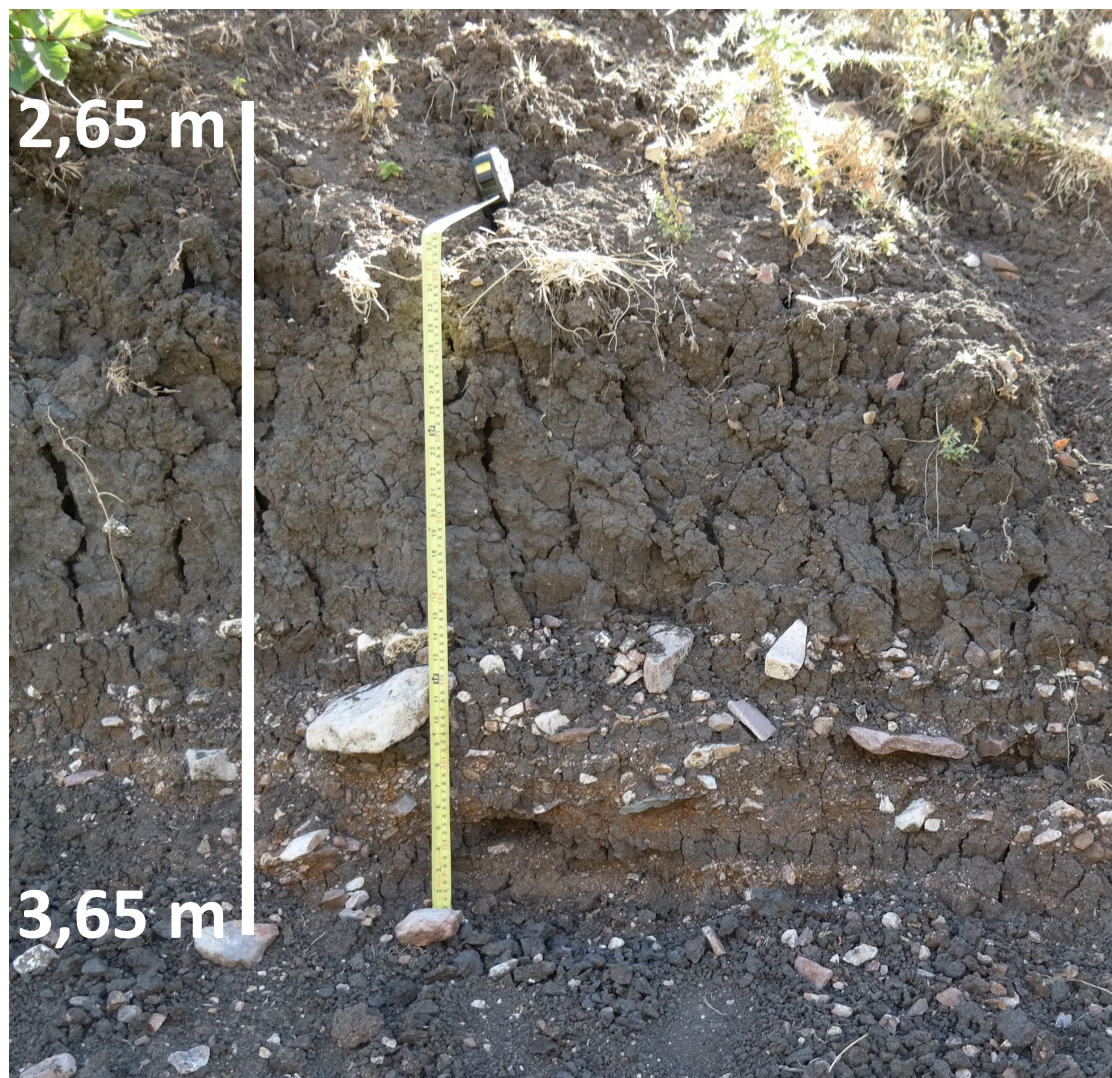



Photograph of section PG2

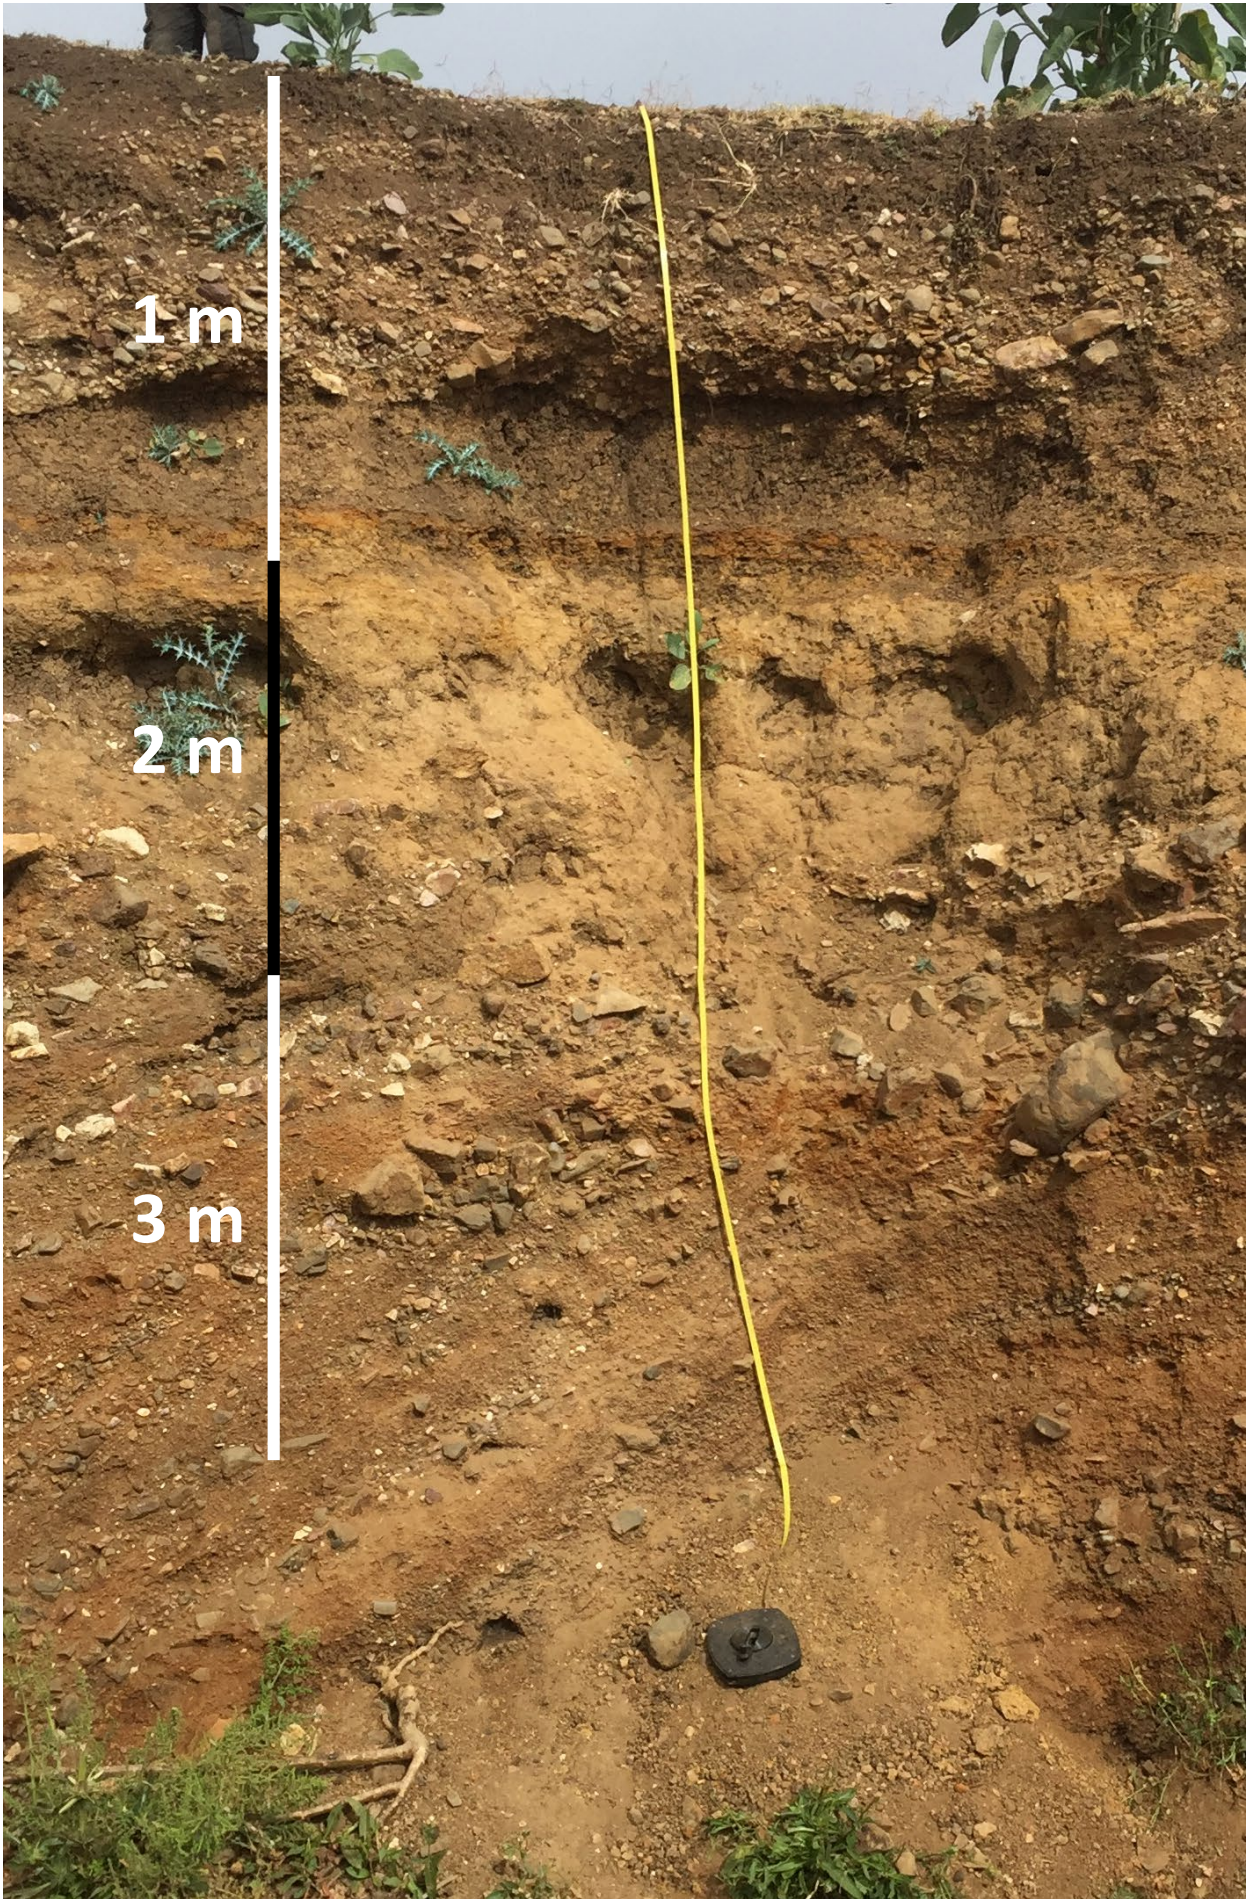

Supplement: Supplementary file 1 [file egqsj-72-37-2023-supplement.pdf]
